# Supplementary material for: Increased FLYWCH1 Expression is Negatively Correlated with Wnt/β-catenin Target Gene Expression in Acute Myeloid Leukemia Cells
Source: PubMed Central journal article supplement (PMC6600431; doi:10.3390/ijms20112739), 2019-06-04
Supplement: ijms-20-02739-s001.pdf [file ijms-20-02739-s001.pdf]

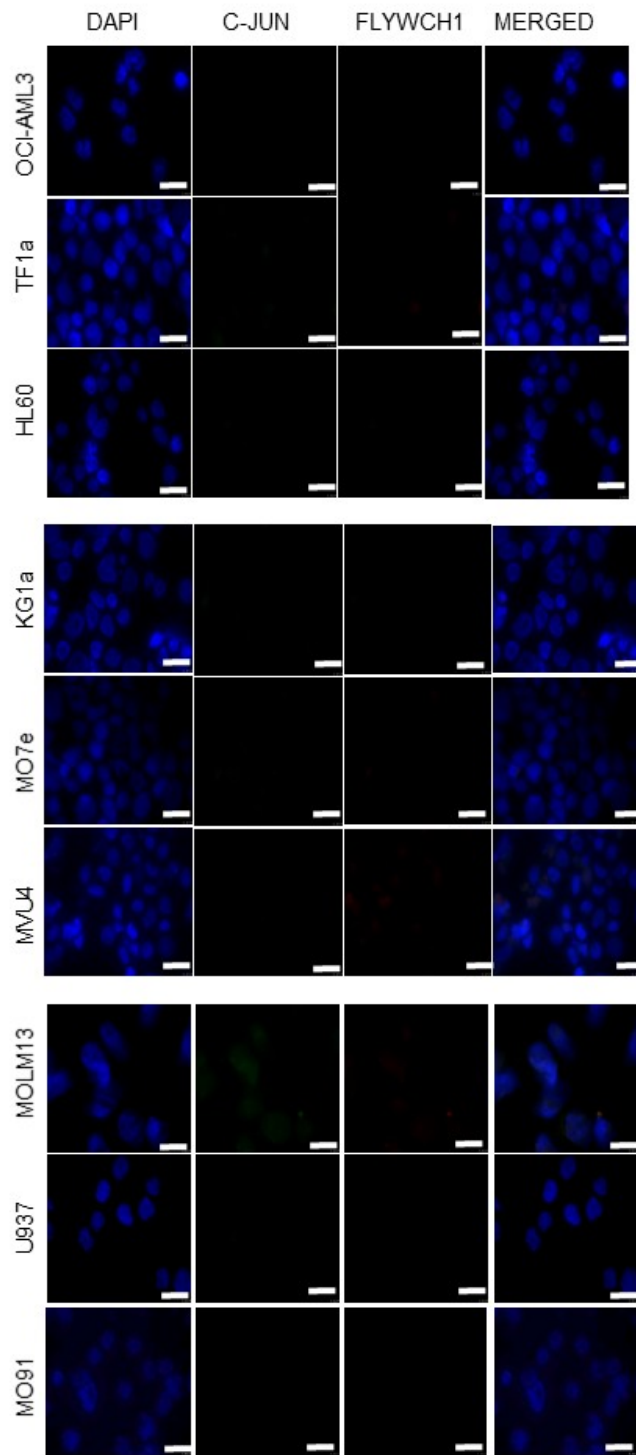

Supplementary  
Figure 1, Almars A, et al.

**Supplementary Figure 1.** Images are the control cells stained for the secondary antibody only. The secondary antibodies showed no background in the negative controls, however there was a very little background in fluorescent images for MVU4 and MOLM13 cells. Scale bars, 50  $\mu$ m.

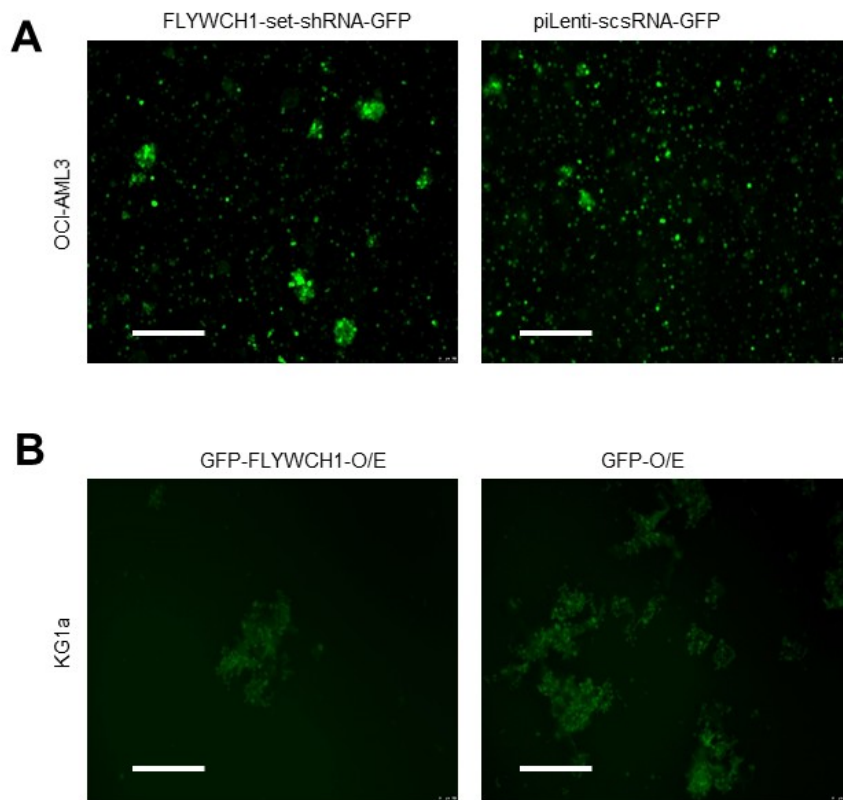

Supplementary Figure 2, Almars A, et al.

**Supplementary Figure 2.** **A)** Representative fluorescent images of OCI-AML3 cells transduced with GFP-expressing lentiviral vectors; FLYWCH1-set-shRNA-GFP (left panel), piLenti-scsRNA (scrambled control shRNA) -GFP (right panel). **B)** Representative fluorescent images of KG1a cells transduced with GFP-expressing lentiviral vectors expressing the full-length cDNA of human FLYWCH1 tagged with eGFP (GFP-FLYWCH1) and pLV-GFP backbone vector. Scale bars, 100  $\mu$ m.

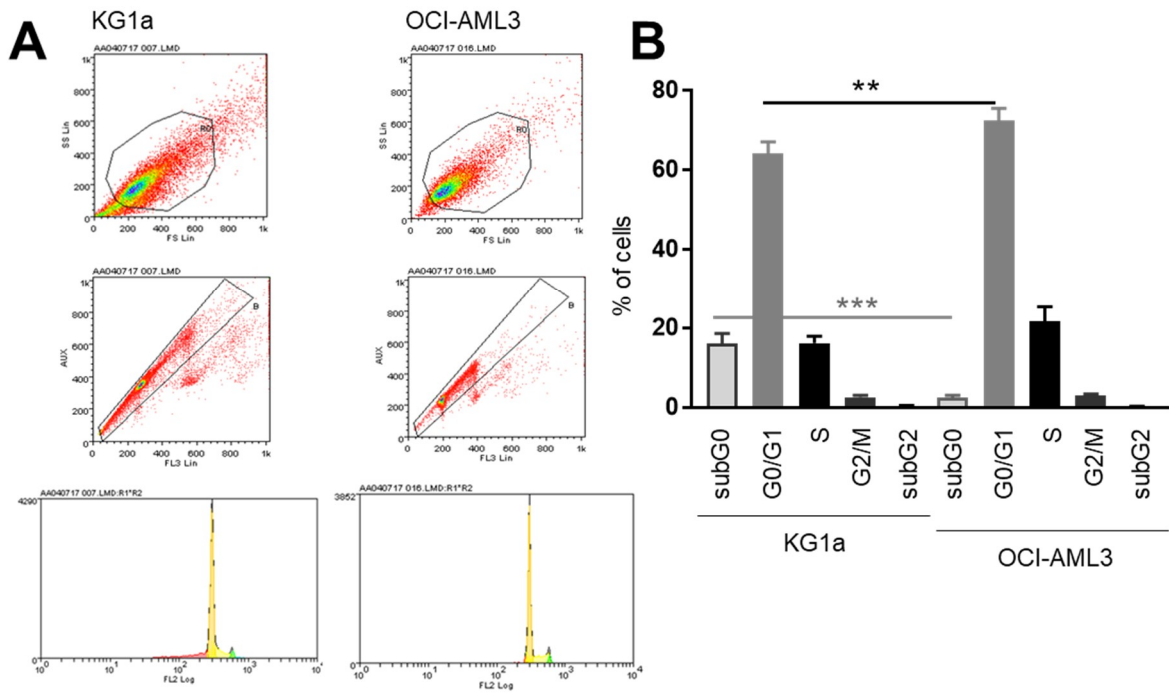

Supplementary Figure 3, Almars A, et al.

**Supplementary Figure 3.** **A)** Panels show the representatives of flow cytometry and Propidium iodide (PI) staining analysis of KG1a and OCI-AML3 cell lines. **B)** The cell cycle status of KG1a and OCI-AML3 cells was monitored via flow cytometry and PI staining in triplicates. Error bars present mean  $\pm$  SEM of three independent experiments (\*,  $P < 0.05$ ; \*\*,  $P < 0.01$ ; \*\*\* $P < 0.001$ ).
